# Supplementary material for: Measurement Invariance of the Subjective Happiness Scale Across Countries, Gender, Age, and Time
Source: PubMed Central journal article supplement — Assessment. 2021 Feb 12;29(4):826–41. doi: 10.1177/1073191121993558 (PMC9047108; doi:10.1177/1073191121993558), 2021-02-12
Supplement: sj-pdf-1-asm-10.1177_1073191121993558.pdf [file sj-pdf-1-asm-10.1177_1073191121993558.pdf]

## Supplemental Materials

Table S1

*Descriptive statistics for the four items and the total SHS score.*

|                |                     | Item 1       | Item 2      | Item 3      | Item 4       | SHS         |
|----------------|---------------------|--------------|-------------|-------------|--------------|-------------|
| Country        |                     |              |             |             |              |             |
| Australia      | <i>M (SD)</i>       | 5.22 (1.40)  | 4.95 (1.47) | 4.78 (1.56) | 4.84 (1.82)  | 4.95 (1.32) |
|                | Skewness / Kurtosis | -.90 / .46   | -.66 / .01  | -.61 / -.36 | -.47 / -.95  | -.62 / -.10 |
| Colombia       | <i>M (SD)</i>       | 5.29 (1.15)  | 5.37 (1.31) | 5.09 (1.49) | 4.81 (1.91)  | 5.14 (1.07) |
|                | Skewness / Kurtosis | -1.02 / 1.64 | -1.05 / .99 | -.77 / .03  | -.47 / -1.10 | -.54 / .32  |
| Czech Republic | <i>M (SD)</i>       | 5.25 (1.15)  | 5.15 (1.29) | 4.47 (1.64) | 4.98 (1.75)  | 4.96 (1.19) |
|                | Skewness / Kurtosis | -.91 / 1.38  | -.94 / .90  | -.34 / -.66 | -.58 / -.80  | -.65 / .35  |
| England (GB)   | <i>M (SD)</i>       | 4.88 (1.5)   | 4.56 (1.55) | 4.32 (1.6)  | 4.52 (1.83)  | 4.57 (1.28) |
|                | Skewness / Kurtosis | -.70 / -.05  | -.51 / -.44 | -.28 / -.74 | -.29 / -1.05 | -.39 / -.37 |
| Hungary        | <i>M (SD)</i>       | 4.89 (1.32)  | 5.12 (1.46) | 4.43 (1.64) | 4.69 (1.93)  | 4.78 (1.29) |
|                | Skewness / Kurtosis | -.74 / .38   | -.60 / -.20 | -.39 / -.65 | -.39 / -1.15 | -.53 / -.13 |
| Mexico         | <i>M (SD)</i>       | 5.63 (1.1)   | 5.55 (1.26) | 5.2 (1.44)  | 4.95 (1.95)  | 5.33 (1.11) |
|                | Skewness / Kurtosis | -1.11 / 1.87 | -.87 / .27  | -.76 / .09  | -.64 / -.86  | -.68 / .10  |
| New Zealand    | <i>M (SD)</i>       | 5.08 (1.36)  | 4.83 (1.47) | 4.70 (1.54) | 4.84 (1.8)   | 4.86 (1.3)  |
|                | Skewness / Kurtosis | -.75 / .28   | -.47 / -.32 | -.41 / -.53 | -.47 / -.93  | -.48 / -.24 |
| Slovenia       | <i>M (SD)</i>       | 5.08 (1.29)  | 4.77 (1.54) | 4.36 (1.59) | 4.61 (1.82)  | 4.7 (1.26)  |
|                | Skewness / Kurtosis | -.78 / .60   | -.57 / -.26 | -.19 / -.66 | -.29 / -.97  | -.48 / .19  |
| USA            | <i>M (SD)</i>       | 5.31 (1.34)  | 5.14 (1.44) | 4.86 (1.58) | 4.9 (1.84)   | 5.05 (1.30) |
|                | Skewness / Kurtosis | -.89 / .83   | -.71 / .17  | -.51 / -.52 | -.46 / -1.0  | -.55 / -.08 |
| Gender         |                     |              |             |             |              |             |
| Female         | <i>M (SD)</i>       | 5.14 (1.33)  | 5.02 (1.46) | 4.68 (1.58) | 4.83 (1.85)  | 4.92 (1.28) |
|                | Skewness / Kurtosis | -.81 / .53   | -.62 / -.09 | -.46 / -.52 | -.48 / -.97  | -.54 / -.10 |
| Male           | <i>M (SD)</i>       | 5.04 (1.40)  | 4.95 (1.51) | 4.61 (1.64) | 4.65 (1.86)  | 4.81 (1.30) |
|                | Skewness / Kurtosis | -.82 / .33   | -.62 / -.23 | -.40 / -.70 | -.31 / -1.12 | -.46 / -.22 |
| Age            |                     |              |             |             |              |             |
| 17-30 yrs.     | <i>M (SD)</i>       | 5.01 (1.34)  | 4.83 (1.52) | 4.46 (1.59) | 4.62 (1.86)  | 4.73 (1.28) |
|                | Skewness / Kurtosis | -.80 / .48   | -.52 / -.37 | -.34 / -.65 | -.31 / -1.12 | -.48 / -.16 |
| 31-45 yrs.     | <i>M (SD)</i>       | 5.10 (1.34)  | 5.03 (1.42) | 4.68 (1.57) | 4.89 (1.80)  | 4.93 (1.25) |
|                | Skewness / Kurtosis | -.78 / .41   | -.58 / -.12 | -.43 / -.57 | -.51 / -.90  | -.45 / -.27 |
| 46-60 yrs.     | <i>M (SD)</i>       | 5.22 (1.35)  | 5.14 (1.43) | 4.90 (1.59) | 4.89 (1.87)  | 5.04 (1.30) |
|                | Skewness / Kurtosis | -.89 / .72   | -.81 / .43  | -.64 / -.27 | -.55 / -.88  | -.70 / .23  |
| 61-75 yrs.     | <i>M (SD)</i>       | 5.69 (1.25)  | 5.64 (1.28) | 5.28 (1.41) | 5.26 (1.83)  | 5.47 (1.19) |
|                | Skewness / Kurtosis | -1.07 / 1.13 | -.95 / .55  | -.86 / .27  | -.79 / -.69  | -.88 / .45  |
| Time           |                     |              |             |             |              |             |
| Time 1         | <i>M (SD)</i>       | 5.18 (1.40)  | 4.92 (1.49) | 4.69 (1.59) | 4.90 (1.79)  | 4.92 (1.33) |
|                | Skewness / Kurtosis | -.67 / -.06  | -.46 / -.45 | -.39 / -.75 | -.50 / -.91  | -.42 / -.56 |
| Time 2         | <i>M (SD)</i>       | 5.21 (1.34)  | 4.93 (1.42) | 4.76 (1.55) | 4.83 (1.78)  | 4.93 (1.30) |
|                | Skewness / Kurtosis | -.86 / .46   | -.47 / -.32 | -.52 / -.40 | -.44 / -.90  | -.52 / -.08 |
| Time 3         | <i>M (SD)</i>       | 5.17 (1.37)  | 4.92 (1.48) | 4.71 (1.52) | 4.91 (1.84)  | 4.93 (1.35) |
|                | Skewness / Kurtosis | -.81 / .36   | -.48 / -.42 | -.45 / -.54 | -.44 / -1.08 | -.44 / -.48 |
| Time 4         | <i>M (SD)</i>       | 5.25 (1.31)  | 5.02 (1.41) | 4.78 (1.56) | 4.91 (1.82)  | 4.99 (1.33) |
|                | Skewness / Kurtosis | -.70 / .05   | -.47 / -.45 | -.48 / -.63 | -.53 / -.90  | -.50 / -.35 |
| Time 5         | <i>M (SD)</i>       | 5.22 (1.32)  | 5.01 (1.37) | 4.79 (1.47) | 4.91 (1.80)  | 4.98 (1.30) |
|                | Skewness / Kurtosis | -.72 / .04   | -.48 / -.33 | -.50 / -.49 | -.52 / -.92  | -.49 / -.38 |

Table S2  
*Factor loadings, item-total correlations and reliability coefficients for the SHS.*

|                |                        | Item 1 | Item 2 | Item 3 | Item 4 | $r_{xx}$ |
|----------------|------------------------|--------|--------|--------|--------|----------|
| Country        |                        |        |        |        |        |          |
| Australia      | Factor loading [Omega] | .90    | .84    | .86    | .58    | .86      |
|                | Item-total $r$ [Alpha] | .80    | .75    | .78    | .55    | .86      |
| Colombia       | Factor loading [Omega] | .90    | .84    | .67    | .22    | .70      |
|                | Item-total $r$ [Alpha] | .66    | .61    | .56    | .22    | .69      |
| Czech Republic | Factor loading [Omega] | .89    | .82    | .72    | .59    | .82      |
|                | Item-total $r$ [Alpha] | .75    | .68    | .67    | .57    | .82      |
| England (GB)   | Factor loading [Omega] | .93    | .88    | .70    | .39    | .81      |
|                | Item-total $r$ [Alpha] | .75    | .71    | .65    | .38    | .80      |
| Hungary        | Factor loading [Omega] | .88    | .88    | .72    | .53    | .82      |
|                | Item-total $r$ [Alpha] | .75    | .74    | .64    | .49    | .82      |
| Mexico         | Factor loading [Omega] | .90    | .83    | .69    | .42    | .75      |
|                | Item-total $r$ [Alpha] | .70    | .66    | .58    | .40    | .75      |
| New Zealand    | Factor loading [Omega] | .93    | .88    | .81    | .57    | .86      |
|                | Item-total $r$ [Alpha] | .83    | .78    | .75    | .54    | .86      |
| Slovenia       | Factor loading [Omega] | .92    | .88    | .75    | .45    | .82      |
|                | Item-total $r$ [Alpha] | .79    | .72    | .68    | .43    | .82      |
| USA            | Factor loading [Omega] | .93    | .89    | .83    | .53    | .86      |
|                | Item-total $r$ [Alpha] | .81    | .77    | .75    | .52    | .85      |
| Gender         |                        |        |        |        |        |          |
| Female         | Factor loading [Omega] | .91    | .87    | .78    | .53    | .84      |
|                | Item-total $r$ [Alpha] | .79    | .74    | .70    | .50    | .84      |
| Male           | Factor loading [Omega] | .92    | .88    | .76    | .47    | .83      |
|                | Item-total $r$ [Alpha] | .77    | .74    | .69    | .45    | .82      |
| Age            |                        |        |        |        |        |          |
| 17-30 yrs.     | Factor loading [Omega] | .91    | .87    | .75    | .49    | .82      |
|                | Item-total $r$ [Alpha] | .77    | .73    | .68    | .47    | .82      |
| 31-45 yrs.     | Factor loading [Omega] | .90    | .87    | .76    | .52    | .83      |
|                | Item-total $r$ [Alpha] | .78    | .74    | .68    | .49    | .83      |
| 46-60 yrs.     | Factor loading [Omega] | .93    | .87    | .82    | .54    | .85      |
|                | Item-total $r$ [Alpha] | .81    | .76    | .74    | .52    | .85      |
| 61-75 yrs.     | Factor loading [Omega] | .92    | .84    | .83    | .52    | .83      |
|                | Item-total $r$ [Alpha] | .80    | .73    | .72    | .49    | .83      |
| Time           |                        |        |        |        |        |          |
| Time 1         | factor loading [Omega] | .93    | .90    | .84    | .56    | .87      |
|                | Item-total $r$ [Alpha] | .83    | .80    | .77    | .54    | .87      |
| Time 2         | factor loading [Omega] | .94    | .90    | .85    | .57    | .87      |
|                | Item-total $r$ [Alpha] | .84    | .80    | .79    | .55    | .87      |
| Time 3         | factor loading [Omega] | .93    | .92    | .87    | .62    | .89      |
|                | Item-total $r$ [Alpha] | .85    | .83    | .81    | .60    | .89      |
| Time 4         | factor loading [Omega] | .94    | .89    | .88    | .62    | .89      |
|                | Item-total $r$ [Alpha] | .85    | .82    | .80    | .60    | .89      |
| Time 5         | factor loading [Omega] | .95    | .89    | .88    | .62    | .89      |
|                | Item-total $r$ [Alpha] | .85    | .81    | .81    | .61    | .89      |

*Note.* Factor loading = standardized factor loading; Omega = McDonald's omega reliability coefficient; item-total  $r$  = corrected item-total correlation; Alpha = Cronbach's alpha reliability coefficient for the total score,  $r_{xx}$  = coefficient of reliability.

Table S3

*Cohen q effect sizes for the pairwise comparisons of correlations between SHS and TSWLS for the nine countries.*

|                    |        |                | AUS  | COL  | CZE  | GB-ENG | HUN  | MEX  | NZL  | SVN  |
|--------------------|--------|----------------|------|------|------|--------|------|------|------|------|
| TSWLS –<br>past    | COL    | Colombia       | .10  |      |      |        |      |      |      |      |
|                    | CZE    | Czech Republic | -.05 | -.15 |      |        |      |      |      |      |
|                    | GB-ENG | England (GB)   | -.06 | -.16 | -.01 |        |      |      |      |      |
|                    | HUN    | Hungary        | -.10 | -.20 | -.05 | -.04   |      |      |      |      |
|                    | MEX    | Mexico         | -.01 | -.11 | .04  | .05    | .09  |      |      |      |
|                    | NZL    | New Zealand    | -.02 | -.12 | .03  | .05    | .08  | -.01 |      |      |
|                    | SVN    | Slovenia       | -.07 | -.17 | -.02 | -.01   | .03  | -.06 | -.05 |      |
|                    | USA    | USA            | .01  | -.09 | .06  | .07    | .11  | .02  | .02  | .08  |
| TSWLS –<br>present | COL    | Colombia       | .11  |      |      |        |      |      |      |      |
|                    | CZE    | Czech Republic | .15  | .04  |      |        |      |      |      |      |
|                    | GB-ENG | England (GB)   | -.01 | -.12 | -.16 |        |      |      |      |      |
|                    | HUN    | Hungary        | .05  | -.06 | -.10 | .06    |      |      |      |      |
|                    | MEX    | Mexico         | -.03 | -.14 | -.18 | -.02   | -.08 |      |      |      |
|                    | NZL    | New Zealand    | .07  | -.04 | -.08 | .07    | .01  | .10  |      |      |
|                    | SVN    | Slovenia       | -.22 | -.33 | -.37 | -.22   | -.27 | -.19 | -.29 |      |
|                    | USA    | USA            | .06  | -.05 | -.09 | .07    | .01  | .09  | -.01 | .28  |
| TSWLS –<br>future  | COL    | Colombia       | .13  |      |      |        |      |      |      |      |
|                    | CZE    | Czech Republic | .15  | .02  |      |        |      |      |      |      |
|                    | GB-ENG | England (GB)   | -.06 | -.19 | -.20 |        |      |      |      |      |
|                    | HUN    | Hungary        | .08  | -.04 | -.06 | .14    |      |      |      |      |
|                    | MEX    | Mexico         | .09  | -.03 | -.05 | .15    | .01  |      |      |      |
|                    | NZL    | New Zealand    | .01  | -.12 | -.13 | .07    | -.07 | -.08 |      |      |
|                    | SVN    | Slovenia       | -.01 | -.14 | -.16 | .05    | -.10 | -.11 | -.02 |      |
|                    | USA    | USA            | -.04 | -.17 | -.19 | .01    | -.13 | -.14 | -.05 | -.03 |

Table S4

*Cohen q effect sizes for the pairwise comparisons of correlations between SHS and TSWLS for the two genders.*

|                 |      | Female |
|-----------------|------|--------|
| TSWLS – past    | Male | -.04   |
| TSWLS – present | Male | -.03   |
| TSWLS – future  | Male | .00    |

Table S5

*Cohen q effect sizes for the pairwise comparisons of correlations between SHS and TSWLS for the four age groups.*

|                    |            | 17-30 yrs. | 31-45 yrs. | 46-60 yrs. |
|--------------------|------------|------------|------------|------------|
| TSWLS –<br>past    | 31-45 yrs. | .03        |            |            |
|                    | 46-60 yrs. | .04        | .01        |            |
|                    | 61-75 yrs. | .06        | .03        | .02        |
| TSWLS –<br>present | 31-45 yrs. | .03        |            |            |
|                    | 46-60 yrs. | -.04       | -.07       |            |
|                    | 61-75 yrs. | .00        | -.03       | .04        |
| TSWLS –<br>future  | 31-45 yrs. | -.01       |            |            |
|                    | 46-60 yrs. | -.09       | -.07       |            |
|                    | 61-75 yrs. | -.03       | -.02       | .05        |
